# Supplementary material
Source: publisher site journal article supplement (https://www.dovepress.com/article/348946)
Supplement: Supplementary file 1 [file get_supplementary_file.php]

**Supplementary Table 1** Authors' academic indices based on this study's article collection

| **Author** | **H-index** | **G-index** | **M-index** | **TC** | **NP** |
| --- | --- | --- | --- | --- | --- |
| Arendt-Nielsen L | 40 | 73 | 1.667 | 5453 | 93 |
| Nijs J | 34 | 62 | 2.267 | 4040 | 86 |
| Meeus M | 32 | 57 | 2.133 | 3286 | 65 |
| Ji RR | 38 | 47 | 1.652 | 9024 | 47 |
| Staud R | 32 | 40 | 1.524 | 3748 | 40 |
| Fernandez-Dd-Las-Penas C | 22 | 37 | 1.467 | 1431 | 39 |
| Sessle BJ | 22 | 38 | 0.917 | 1725 | 38 |
| Treede RD | 26 | 36 | 1.083 | 4181 | 36 |
| Willis WD | 26 | 32 | 1.083 | 2079 | 32 |
| Gao YJ | 24 | 31 | 1.714 | 2254 | 31 |
| Woolf CJ | 29 | 31 | 1.261 | 12153 | 31 |
| Graven-Nielsen T | 17 | 30 | 0.708 | 1964 | 30 |
| Wang J | 16 | 29 | 1.067 | 878 | 33 |
| Dickenson AH | 18 | 28 | 0.75 | 1511 | 28 |
| Ickmans K | 12 | 23 | 1.091 | 578 | 27 |
| Zhang Y | 12 | 21 | 0.632 | 477 | 27 |
| Price DD | 24 | 26 | 1.143 | 3036 | 26 |
| Wang Y | 13 | 16 | 0.929 | 313 | 26 |
| Baron R | 19 | 25 | 0.792 | 1838 | 25 |
| Clauw DJ | 17 | 25 | 1.214 | 2034 | 25 |

**Abbreviations:** NP, number of publications; TC, total citations

**Supplementary Table 2** Top 20 articles related to central sensitization

| **Article** | **DOI** | **Local Citations** | **Global Citations** | **LC/GC Ratio (%)** |
| --- | --- | --- | --- | --- |
| Woolf CJ, 2011, PAIN | 10.1016/j.pain.2010.09.030 | 748 | 2014 | 37.14 |
| Latremoliere A, 2009, J PAIN | 10.1016/j.jpain.2009.06.012 | 664 | 1731 | 38.36 |
| Ji RR, 2003, TRENDS NEUROSCI | 10.1016/j.tins.2003.09.017 | 377 | 941 | 40.06 |
| Kawasaki Y, 2008, J NEUROSCI | 10.1523/JNEUROSCI.3338-07.2008 | 201 | 715 | 28.11 |
| Arendt-Nielsen L, 2010, PAIN | 10.1016/j.pain.2010.04.003 | 167 | 581 | 28.74 |
| Staud R, 2001, PAIN | 10.1016/S0304-3959(00)00432-2 | 156 | 518 | 30.12 |
| Silberstein SD, 2004, CEPHALALGIA | 10.1111/j.1468-2982.2004.00892.x | 131 | 7730 | 1.69 |
| Ji RR, 1999, NAT NEUROSCI | 10.1038/16040 | 130 | 588 | 22.11 |
| Meeus M, 2007, CLIN RHEUMATOL | 10.1007/s10067-006-0433-9 | 129 | 319 | 40.44 |
| Ziegler EA, 1999, BRAIN | 10.1093/brain/122.12.2245 | 127 | 319 | 39.81 |
| Mayer TG, 2012, PAIN PRACT | 10.1111/j.1533-2500.2011.00493.x | 122 | 232 | 52.59 |
| Burstein R, 2000, BRAIN | 10.1093/brain/123.8.1703 | 118 | 511 | 23.09 |
| Gao YJ, 2009, J NEUROSCI | 10.1523/JNEUROSCI.3623-08.2009 | 117 | 380 | 30.79 |
| Neblett R, 2013, J PAIN | 10.1016/j.jpain.2012.11.012 | 117 | 215 | 54.42 |
| Samad TA, 2001, NATURE | 10.1038/35068566 | 116 | 976 | 11.89 |
| Ji RR, 2009, BRAIN RES REV | 10.1016/j.brainresrev.2008.12.011 | 115 | 695 | 16.55 |
| Li J, 1999, PAIN | 10.1016/S0304-3959(98)00154-7 | 114 | 235 | 48.51 |
| Costigan M, 2009, ANNU REV NEUROSCI | 10.1146/annurev.neuro.051508.135531 | 102 | 1064 | 9.59 |
| Treede RD, 2008, NEUROLOGY | 10.1212/01.wnl.0000282763.29778.59 | 101 | 1668 | 6.06 |
| Ji RR, 2001, NEUROBIOL DIS | 10.1006/nbdi.2000.0360 | 100 | 504 | 19.84 |

**Abbreviations:** TC, total citations; LC, local citations

**Supplementary Table 3** Top 10 *KeyWords Plus* based on network centrality

| ***KeyWords Plus*** | **Cluster** | **Betweenness Centrality** | **Closeness Centrality** | **PageRank** | **Occurences** |
| --- | --- | --- | --- | --- | --- |
| Central sensitization | 1 | 121.201199 | 0.020833333 | 0.104300307 | 1769 |
| Neuropathic pain | 3 | 21.5775799 | 0.020833333 | 0.06015896 | 839 |
| Pain | 1 | 15.8697546 | 0.020833333 | 0.046162096 | 671 |
| Sensitization | 2 | 10.3574906 | 0.020833333 | 0.043492664 | 540 |
| Central | 2 | 5.73506838 | 0.020833333 | 0.035657339 | 425 |
| Hyperalgesia | 1 | 7.3626288 | 0.020833333 | 0.034847731 | 454 |
| Spinal-cord | 3 | 3.22180203 | 0.019230769 | 0.033546533 | 417 |
| Mechanisms | 1 | 4.62063802 | 0.02 | 0.029391562 | 367 |
| Neurons | 3 | 3.22563968 | 0.02 | 0.028474789 | 353 |
| Activation | 3 | 2.07450171 | 0.019230769 | 0.024783535 | 280 |

**Supplementary Table 4**Top 10 co-cited journals, authors, and articles (ranked by centrality)

| **Top 10 co-cited authors** | | | **Top 10 co-cited articles** | | | **Top 10 co-cited journals** | | |
| --- | --- | --- | --- | --- | --- | --- | --- | --- |
|  | Cluster | Centrality* |  | Cluster | Centrality |  | Cluster | Centrality |
| Woolf CJ | 1 | 118.06 | Woolf CJ, 2000 | 4 | 151.8 | Pain | 2 | 153.67 |
| Treede RD | 4 | 50.30 | Woolf CJ,1983 | 2 | 86.39 | J Neurosci | 1 | 44.05 |
| Koltzenburg M | 4 | 34.07 | Latremoliere A, 2009 | 1 | 75.98 | J Pain | 2 | 37.96 |
| Melzack R | 4 | 31.42 | Ji RR, 2003 | 4 | 60.59 | Neurosci Lett | 1 | 24.94 |
| Baron R | 4 | 26.11 | Woolf CJ, 1991 | 2 | 47.21 | Eur j Pain | 2 | 23.29 |
| Lamotte RH | 4 | 24.19 | Woolf CJ, 2011 | 1 | 45.18 | Anesthesiology | 2 | 23.08 |
| Price DD | 2 | 22.72 | Woolf CJ, 1999 | 2 | 15.45 | Brain Res | 1 | 21.59 |
| Simone Da | 4 | 19.69 | Coderre TJ, 1993 | 2 | 12.39 | Neuroscience | 1 | 21.17 |
| Arendtnielsen I | 2 | 19.49 | Samad Ta 2001 | 4 | 12.25 | J Neurophysiol | 1 | 18.7 |
| Staud R | 2 | 17.39 | Woolf CJ, 1996 | 2 | 10.41 | P Natl Acad Sci Usa | 1 | 16.17 |

**Notes:** Centrality* refers to Betweenness Centrality
